# Supplementary material
Source: HighWire-hosted journal article supplement (https://bmjopen.bmj.com/content/13/3/e063712)
Supplement: inline-supplementary-material-1 [file inline-supplementary-material-1.pdf]

**Table S1 The rank result of the 23 types of common birth defects**

| <b>Number</b> | <b>Birth defect</b>                                                         | <b>N</b> |
|---------------|-----------------------------------------------------------------------------|----------|
| 21            | Conjoined twins                                                             | 0        |
| 13            | Bladder valgus                                                              | 1        |
| 1             | Anencephaly                                                                 | 2        |
| 3             | Encephalocele                                                               | 3        |
| 20            | Gastroschisis                                                               | 3        |
| 8             | Small ears (including no ears)                                              | 6        |
| 10            | Esophageal atresia or stenosis                                              | 8        |
| 2             | Spina bifida                                                                | 12       |
| 18            | Congenital diaphragmatic hernia                                             | 13       |
| 19            | Omphalocele                                                                 | 18       |
| 12            | Hypospadias                                                                 | 27       |
| 11            | Rectoanal atresia or stricture (including anorectal atresia)                | 30       |
| 14            | Equinovarus                                                                 | 41       |
| 4             | Congenital hydrocephalus                                                    | 45       |
| 22            | Down's syndrome                                                             | 79       |
| 9             | Other malformations of the external ear (except for small ears and no ears) | 86       |
| 5, 6, 7       | Orofacial clefts                                                            | 119      |
| 15, 16, 17    | Limb defects                                                                | 210      |
| 23            | Congenital heart defects                                                    | 265      |

**Table S2 Adjusted odds ratios and 95% confidence interval of ambient air pollutants for each interquartile increase during the 2<sup>ed</sup> trimester and birth defects in Wuhan, China**

| Birth defects <sup>a</sup> | PM <sub>10</sub> | PM <sub>2.5</sub>      | NO <sub>2</sub>        | SO <sub>2</sub>        |
|----------------------------|------------------|------------------------|------------------------|------------------------|
|                            | OR (95%CI)       | OR (95%CI)             | OR (95%CI)             | OR (95%CI)             |
| Total                      |                  |                        |                        |                        |
| Birth defects              | 1.01(0.93,1.09)  | 0.95(0.89,1.02)        | 0.99(0.93,1.06)        | <b>0.88(0.80,0.97)</b> |
| CHDs                       | 0.98(0.79,1.22)  | 0.86(0.72,1.04)        | 0.94(0.79,1.11)        | <b>0.75(0.58,0.97)</b> |
| Limb defects               | 1.03(0.87,1.22)  | 0.95(0.82,1.11)        | 1.05(0.92,1.21)        | 1.01(0.83,1.25)        |
| Orofacial clefts           | 1.27(0.86,1.87)  | <b>1.42(1.01,1.99)</b> | 1.27(0.93,1.74)        | 1.38(0.85,2.25)        |
| Male fetus                 |                  |                        |                        |                        |
| Birth defects              | 1.01(0.91,1.12)  | 0.95(0.87,1.04)        | 0.95(0.87,1.03)        | 0.90(0.79,1.02)        |
| CHDs                       | 0.82(0.61,1.10)  | <b>0.69(0.52,0.91)</b> | <b>0.69(0.53,0.88)</b> | <b>0.58(0.41,0.83)</b> |
| Limb defects               | 1.12(0.90,1.38)  | 1.00(0.84,1.20)        | 1.09(0.92,1.29)        | 1.09(0.84,1.41)        |
| Orofacial clefts           | 1.11(0.69,1.81)  | 1.20(0.79,1.82)        | 1.25(0.83,1.87)        | 1.19(0.67,2.12)        |
| Female fetus               |                  |                        |                        |                        |
| Birth defects              | 1.01(0.89,1.14)  | 0.96(0.86,1.07)        | 1.06(0.96,1.17)        | 0.87(0.75,1.00)        |
| CHDs                       | 1.21(0.88,1.66)  | 1.07(0.82,1.39)        | 1.28(0.99,1.65)        | 1.00(0.69,1.44)        |
| Limb defects               | 0.90(0.69,1.18)  | 0.87(0.68,1.12)        | 0.99(0.79,1.25)        | 0.89(0.63,1.25)        |
| Orofacial clefts           | 1.64(0.80,3.36)  | <b>2.02(1.06,3.86)</b> | 1.31(0.79,2.18)        | 2.01(0.75,5.39)        |
| Summer/Spring              |                  |                        |                        |                        |
| Birth defects              | 1.04(0.93,1.17)  | 0.91(0.82,1.01)        | 1.03(0.94,1.13)        | 0.92(0.79,1.06)        |
| CHDs                       | 0.99(0.73,1.33)  | 0.79(0.60,1.04)        | 1.01(0.78,1.29)        | <b>0.64(0.44,0.94)</b> |
| Limb defects               | 1.10(0.86,1.41)  | 0.88(0.69,1.11)        | 1.06(0.87,1.29)        | 0.92(0.67,1.25)        |
| Orofacial clefts           | 1.20(0.64,2.25)  | 1.47(0.81,2.67)        | 1.07(0.66,1.76)        | 1.71(0.74,3.97)        |
| Autumn/Winter              |                  |                        |                        |                        |
| Birth defects              | 0.96(0.86,1.08)  | 1.00(0.91,1.10)        | 0.97(0.89,1.07)        | 0.87(0.75,1.00)        |
| CHDs                       | 1.02(0.74,1.40)  | 1.00(0.76,1.30)        | 0.93(0.72,1.19)        | 1.00(0.68,1.47)        |
| Limb defects               | 0.94(0.74,1.18)  | 0.99(0.82,1.21)        | 1.05(0.87,1.28)        | 1.05(0.77,1.43)        |
| Orofacial clefts           | 1.30(0.78,2.17)  | 1.34(0.88,2.03)        | 1.38(0.90,2.12)        | 1.08(0.58,2.03)        |

Bold values represent statistical significance (two-sided P<0.05).

Abbreviations: CHDs, congenital heart defects; CI, confidence interval; NO<sub>2</sub>, nitrogen dioxide; OR, odds ratio; PM<sub>10</sub>, particulate matter ≤10 µm diameter; PM<sub>2.5</sub>, particulate matter <2.5 µm diameter; SO<sub>2</sub>, sulfur dioxide.

<sup>a</sup> Adjusted for year of conception, maternal age, gravidity, urban/rural, per capita area of roads, per capita of medication beds, unemployment, and per capita of cars.

**Table S3 Adjusted odds ratios and 95% confidence interval of ambient air pollutants for each interquartile increase during the 3<sup>rd</sup> trimester and birth defects in Wuhan, China**

| Birth defects <sup>a</sup> | PM <sub>10</sub>       | PM <sub>2.5</sub>      | NO <sub>2</sub>        | SO <sub>2</sub>        |
|----------------------------|------------------------|------------------------|------------------------|------------------------|
|                            | OR (95%CI)             | OR (95%CI)             | OR (95%CI)             | OR (95%CI)             |
| Total                      |                        |                        |                        |                        |
| Birth defects              | <b>0.86(0.81,0.92)</b> | <b>0.89(0.84,0.94)</b> | <b>0.90(0.85,0.95)</b> | <b>0.92(0.86,0.98)</b> |
| CHDs                       | 0.90(0.79,1.03)        | <b>0.87(0.77,0.98)</b> | <b>0.89(0.79,1.00)</b> | 0.88(0.76,1.01)        |
| Limb defects               | 0.96(0.83,1.12)        | 0.90(0.79,1.04)        | 0.97(0.85,1.10)        | 1.00(0.85,1.17)        |
| Orofacial clefts           | <b>0.78(0.64,0.95)</b> | 0.97(0.81,1.16)        | 0.90(0.76,1.07)        | 0.89(0.72,1.10)        |
| Male fetus                 |                        |                        |                        |                        |
| Birth defects              | <b>0.87(0.80,0.94)</b> | <b>0.88(0.81,0.94)</b> | <b>0.91(0.85,0.97)</b> | 0.96(0.88,1.05)        |
| CHDs                       | 0.85(0.72,1.01)        | 0.88(0.74,1.05)        | 0.88(0.76,1.03)        | <b>0.81(0.67,0.98)</b> |
| Limb defects               | 0.93(0.77,1.11)        | 0.89(0.75,1.05)        | 0.92(0.79,1.08)        | 1.03(0.85,1.25)        |
| Orofacial clefts           | <b>0.78(0.60,1.00)</b> | 0.94(0.75,1.19)        | 0.93(0.75,1.16)        | 0.95(0.72,1.25)        |
| Female fetus               |                        |                        |                        |                        |
| Birth defects              | <b>0.86(0.78,0.94)</b> | <b>0.91(0.84,0.99)</b> | <b>0.89(0.83,0.96)</b> | <b>0.86(0.78,0.95)</b> |
| CHDs                       | 0.93(0.77,1.14)        | 0.92(0.76,1.10)        | 0.91(0.77,1.07)        | 0.98(0.79,1.21)        |
| Limb defects               | 1.01(0.79,1.30)        | 0.94(0.74,1.19)        | 1.05(0.85,1.31)        | 0.93(0.72,1.21)        |
| Orofacial clefts           | 0.78(0.57,1.08)        | 0.99(0.74,1.32)        | 0.85(0.66,1.10)        | 0.79(0.56,1.11)        |
| Summer/Spring              |                        |                        |                        |                        |
| Birth defects              | 1.04(0.94,1.16)        | <b>1.18(1.07,1.31)</b> | 1.06(0.98,1.16)        | 0.96(0.87,1.06)        |
| CHDs                       | 1.07(0.84,1.36)        | 1.16(0.91,1.46)        | 1.13(0.94,1.37)        | 0.84(0.68,1.05)        |
| Limb defects               | 1.06(0.82,1.37)        | 0.89(0.66,1.19)        | 0.97(0.78,1.21)        | 0.94(0.74,1.19)        |
| Orofacial clefts           | 0.96(0.66,1.39)        | 1.37(0.98,1.91)        | 1.22(0.91,1.64)        | 0.93(0.67,1.30)        |
| Autumn/Winter              |                        |                        |                        |                        |
| Birth defects              | <b>0.64(0.56,0.73)</b> | <b>0.78(0.70,0.87)</b> | <b>0.74(0.66,0.82)</b> | 0.86(0.73,1.00)        |
| CHDs                       | <b>0.74(0.55,0.99)</b> | <b>0.73(0.57,0.94)</b> | <b>0.65(0.52,0.82)</b> | 0.82(0.58,1.15)        |
| Limb defects               | 0.78(0.57,1.08)        | 0.82(0.62,1.08)        | 1.05(0.78,1.41)        | 1.07(0.73,1.58)        |
| Orofacial clefts           | 0.78(0.55,1.10)        | <b>0.40(0.27,0.60)</b> | <b>0.52(0.38,0.70)</b> | <b>0.62(0.39,0.99)</b> |

Bold values represent statistical significance (two-sided P<0.05).

Abbreviations: CHDs, congenital heart defects; CI, confidence interval; NO<sub>2</sub>, nitrogen dioxide; OR, odds ratio; PM<sub>10</sub>, particulate matter ≤10 µm diameter; PM<sub>2.5</sub>, particulate matter <2.5 µm diameter; SO<sub>2</sub>, sulfur dioxide.

<sup>a</sup> Adjusted for year of conception, maternal age, gravidity, urban/rural, per capita area of roads, per capita of medication beds, unemployment, and per capita of cars.

**Table S4 Adjusted odds ratios and 95% confidence interval of ambient air pollutants for each interquartile increase during the entire pregnancy and birth defects in Wuhan, China**

| Birth defects <sup>a</sup> | PM <sub>10</sub>       | PM <sub>2.5</sub>      | NO <sub>2</sub>        | SO <sub>2</sub>         |
|----------------------------|------------------------|------------------------|------------------------|-------------------------|
|                            | OR (95%CI)             | OR (95%CI)             | OR (95%CI)             | OR (95%CI)              |
| Total                      |                        |                        |                        |                         |
| Birth defects              | <b>0.85(0.74,0.97)</b> | 0.95(0.83,1.09)        | 1.04(0.95,1.13)        | <b>0.84(0.72,0.98)</b>  |
| CHDs                       | 0.91(0.64,1.29)        | 0.86(0.60,1.23)        | 1.01(0.80,1.27)        | <b>0.60(0.41,0.89)</b>  |
| Limb defects               | 0.91(0.69,1.21)        | 0.85(0.64,1.13)        | 1.14(0.95,1.37)        | 0.97(0.71,1.34)         |
| Orofacial clefts           | 0.68(0.36,1.26)        | 1.16(0.62,2.17)        | 1.34(0.89,2.04)        | 1.45(0.70,2.98)         |
| Male fetus                 |                        |                        |                        |                         |
| Birth defects              | <b>0.81(0.68,0.97)</b> | 0.89(0.75,1.06)        | 0.99(0.89,1.11)        | 0.83(0.68,1.02)         |
| CHDs                       | 0.81(0.50,1.31)        | 0.72(0.44,1.17)        | <b>0.69(0.50,0.94)</b> | <b>0.52(0.31,0.89)</b>  |
| Limb defects               | 0.94(0.66,1.33)        | 0.75(0.53,1.07)        | 1.22(0.97,1.53)        | 0.90(0.61,1.33)         |
| Orofacial clefts           | 0.69(0.32,1.48)        | 1.36(0.64,2.87)        | 1.48(0.86,2.53)        | 1.08(0.46,2.53)         |
| Female fetus               |                        |                        |                        |                         |
| Birth defects              | 0.92(0.75,1.13)        | 1.06(0.86,1.30)        | 1.11(0.97,1.27)        | 0.86(0.68,1.09)         |
| CHDs                       | 1.06(0.62,1.82)        | 1.05(0.63,1.76)        | <b>1.59(1.11,2.28)</b> | 0.71(0.40,1.28)         |
| Limb defects               | 0.86(0.54,1.38)        | 1.09(0.67,1.79)        | 1.01(0.75,1.37)        | 1.12(0.64,1.97)         |
| Orofacial clefts           | 0.64(0.22,1.84)        | 0.84(0.28,2.54)        | 1.16(0.61,2.21)        | 2.99(0.77,11.70)        |
| Autumn/Winter              |                        |                        |                        |                         |
| Birth defects              | 0.92(0.76,1.12)        | 1.07(0.89,1.28)        | 1.04(0.93,1.17)        | 0.98(0.79,1.22)         |
| CHDs                       | 0.94(0.57,1.55)        | 1.02(0.65,1.60)        | 1.22(0.91,1.63)        | 0.65(0.38,1.10)         |
| Limb defects               | 0.97(0.65,1.45)        | 0.85(0.57,1.27)        | 1.06(0.84,1.35)        | 0.82(0.52,1.29)         |
| Orofacial clefts           | 0.91(0.34,2.43)        | 1.54(0.55,4.28)        | 1.10(0.61,1.98)        | <b>3.91(1.17,13.04)</b> |
| Summer/Spring              |                        |                        |                        |                         |
| Birth defects              | <b>0.74(0.60,0.90)</b> | <b>0.80(0.65,0.97)</b> | 1.02(0.89,1.17)        | <b>0.73(0.58,0.92)</b>  |
| CHDs                       | 0.76(0.44,1.30)        | 0.76(0.44,1.32)        | 0.75(0.52,1.08)        | 0.61(0.33,1.13)         |
| Limb defects               | 0.82(0.55,1.23)        | 0.83(0.55,1.26)        | 1.26(0.95,1.67)        | 1.12(0.71,1.77)         |
| Orofacial clefts           | 0.56(0.24,1.30)        | 0.99(0.43,2.24)        | 1.62(0.89,2.95)        | 0.74(0.29,1.91)         |

Bold values represent statistical significance (two-sided P<0.05).

Abbreviations: CHDs, congenital heart defects; CI, confidence interval; NO<sub>2</sub>, nitrogen dioxide; OR, odds ratio; PM<sub>10</sub>, particulate matter ≤10 µm diameter; PM<sub>2.5</sub>, particulate matter <2.5 µm diameter; SO<sub>2</sub>, sulfur dioxide.

<sup>a</sup> Adjusted for year of conception, maternal age, gravidity, urban/rural, per capita area of roads, per capita of medication beds, unemployment, and per capita of cars.

**Table S5 Adjusted odds ratios and 95% confidence interval of ambient air pollutants for the duration of peak level exposure during the 1<sup>st</sup> trimester and birth defects in Wuhan, China**

| <b>Birth defects<sup>a</sup></b> | <b>PM10<br/>OR (95%CI)</b> | <b>PM2.5<br/>OR (95%CI)</b> | <b>NO2<br/>OR (95%CI)</b> | <b>SO2<br/>OR (95%CI)</b> |
|----------------------------------|----------------------------|-----------------------------|---------------------------|---------------------------|
| Total                            |                            |                             |                           |                           |
| Birth defects                    | 1.03(0.90,1.17)            | 1.10(0.94,1.28)             | <b>1.40(1.26,1.57)</b>    | 1.04(0.86,1.27)           |
| CHDs                             | 0.91(0.67,1.23)            | 1.05(0.74,1.49)             | <b>1.39(1.08,1.77)</b>    | 1.18(0.75,1.85)           |
| Limb defects                     | 1.02(0.74,1.41)            | 1.24(0.87,1.77)             | <b>1.37(1.04,1.81)</b>    | 1.00(0.64,1.58)           |
| Orofacial clefts                 | 0.67(0.42,1.06)            | 0.92(0.54,1.54)             | 1.31(0.91,1.89)           | 0.90(0.47,1.73)           |
| Male fetus                       |                            |                             |                           |                           |
| Birth defects                    | 1.08(0.90,1.29)            | 1.04(0.85,1.28)             | <b>1.33(1.15,1.54)</b>    | 0.98(0.75,1.27)           |
| CHDs                             | 1.01(0.67,1.52)            | 1.03(0.64,1.65)             | 1.19(0.85,1.67)           | 1.11(0.59,2.11)           |
| Limb defects                     | 1.07(0.71,1.61)            | 1.18(0.75,1.85)             | <b>1.48(1.05,2.08)</b>    | 0.85(0.47,1.52)           |
| Orofacial clefts                 | 0.67(0.37,1.22)            | 0.83(0.41,1.65)             | 1.17(0.73,1.87)           | 0.99(0.96,1.02)           |
| Female fetus                     |                            |                             |                           |                           |
| Birth defects                    | 0.99(0.80,1.21)            | 1.17(0.93,1.47)             | <b>1.52(1.29,1.80)</b>    | 1.08(0.81,1.44)           |
| CHDs                             | 0.78(0.50,1.23)            | 1.00(0.60,1.65)             | <b>1.57(1.10,2.25)</b>    | 1.09(0.59,2.03)           |
| Limb defects                     | 0.96(0.56,1.63)            | 1.31(0.74,2.34)             | 1.21(0.76,1.95)           | 1.24(0.60,2.56)           |
| Orofacial clefts                 | 0.71(0.35,1.45)            | 1.01(0.46,2.23)             | 1.62(0.90,2.91)           | 1.01(0.39,2.61)           |
| Autumn/Winter                    |                            |                             |                           |                           |
| Birth defects                    | 1.00(0.81,1.23)            | 1.24(0.99,1.55)             | 1.18(0.99,1.40)           | 1.12(0.78,1.61)           |
| CHDs                             | 1.25(0.75,2.08)            | 1.02(0.63,1.64)             | 1.46(0.97,2.19)           | 1.29(0.54,3.08)           |
| Limb defects                     | 1.01(0.59,1.70)            | 1.46(0.85,2.53)             | 1.22(0.77,1.94)           | 1.00(0.46,2.18)           |
| Orofacial clefts                 | 0.77(0.39,1.55)            | 0.99(0.48,2.03)             | <b>2.31(1.15,4.66)</b>    | 1.48(0.50,4.41)           |
| Summer/Spring                    |                            |                             |                           |                           |
| Birth defects                    | 1.03(0.78,1.36)            | 1.00(0.61,1.65)             | 1.23(1.00,1.52)           | 1.07(0.76,1.51)           |
| CHDs                             | 0.71(0.37,1.39)            | 0.66(0.16,2.83)             | 0.77(0.45,1.32)           | 1.52(0.69,3.37)           |
| Limb defects                     | 1.58(0.81,3.08)            | 2.17(0.92,5.08)             | <b>1.61(1.01,2.57)</b>    | 0.92(0.42,2.02)           |
| Orofacial clefts                 | 0.35(0.12,1.04)            | 0.64(0.08,4.94)             | 0.59(0.25,1.39)           | 0.68(0.19,2.48)           |

Bold values represent statistical significance (two-sided P<0.05).

Abbreviations: CHDs, congenital heart defects; CI, confidence interval; NO<sub>2</sub>, nitrogen dioxide; OR, odds ratio; PM<sub>10</sub>, particulate matter ≤10 μm diameter; PM<sub>2.5</sub>, particulate matter <2.5 μm diameter; SO<sub>2</sub>, sulfur dioxide.

<sup>a</sup> Adjusted for year of conception, maternal age, gravidity, urban/rural, per capita area of roads, per capita of medication beds, unemployment, and per capita of cars.
